# Supplementary material for: Essential role of MED1 in the transcriptional regulation of ER-dependent oncogenic miRNAs in breast cancer
Source: PubMed Central journal article supplement (PMC6081450; doi:10.1038/s41598-018-29546-9), 2018-08-07
Supplement: 41598_2018_29546_MOESM1_ESM.pdf [file 41598_2018_29546_MOESM1_ESM.pdf]

## **Supplementary Information**

### **Essential role of MED1 in the transcriptional regulation of ER-dependent oncogenic miRNAs in breast cancer**

**Neha Nagpal<sup>1\$#</sup>, Shivani Sharma<sup>1#</sup>, Sourobh Maji<sup>2</sup>, Giorgio Durante<sup>3</sup>, Manuela Ferracin<sup>3</sup>,  
Jitendra K. Thakur<sup>2\*</sup>, Ritu Kulshreshtha<sup>1\*</sup>**

<sup>1</sup>Department of Biochemical Engineering and Biotechnology, Indian Institute of Technology Delhi, New Delhi-110016, India

<sup>2</sup>National Institute of Plant Genome Research, Aruna Asaf Ali Marg, New Delhi-110067, India

<sup>3</sup>Department of Experimental, Diagnostic and Specialty Medicine (DIMES), University of Bologna, 40126 Bologna, Italy

<sup>\$</sup>Present Address- Children's Hospital, Harvard Medical School, Boston, MA, USA

<sup>#</sup> Authors contributed equally

<sup>\*</sup> RK and JKT are equivalent corresponding authors.

To whom the correspondence should be addressed: Dr. Ritu Kulshreshtha, Department of Biochemical Engineering and Biotechnology, Indian Institute of Technology Delhi, New Delhi, India-110016 Tel: +91-11-26591017, Fax: +91-11-26582282, email: [ritu@dbeb.iitd.ac.in](mailto:ritu@dbeb.iitd.ac.in); [drritukulshreshtha@gmail.com](mailto:drritukulshreshtha@gmail.com). Dr. Jitendra K. Thakur, National Institute of Plant Genome Research, Aruna Asaf Ali Marg, New Delhi, India-110067, Tel: +91-11-26735151, email: [jthakur@nipgr.ac.in](mailto:jthakur@nipgr.ac.in)

**Running Title:** Role of MED1 in regulation of miR-191/425 cluster

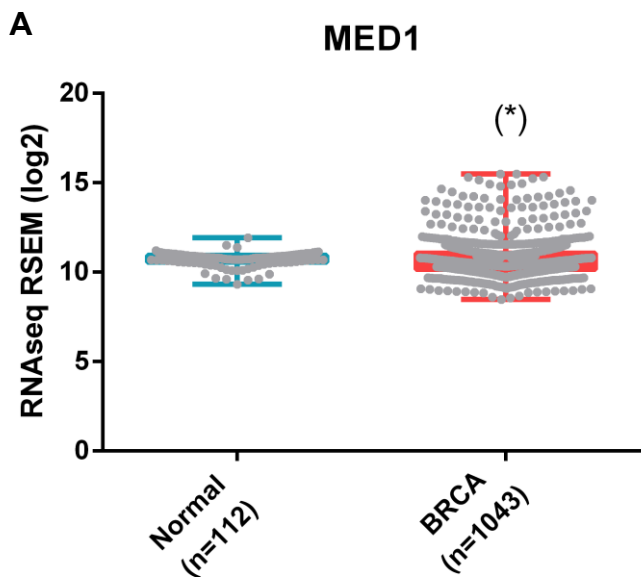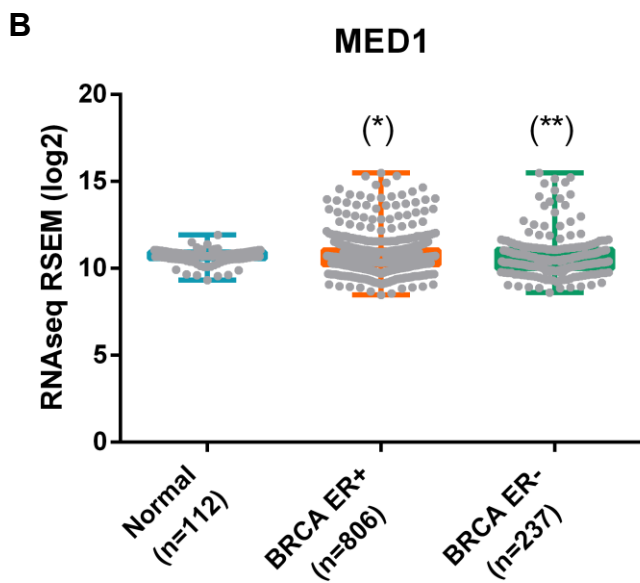

**C**

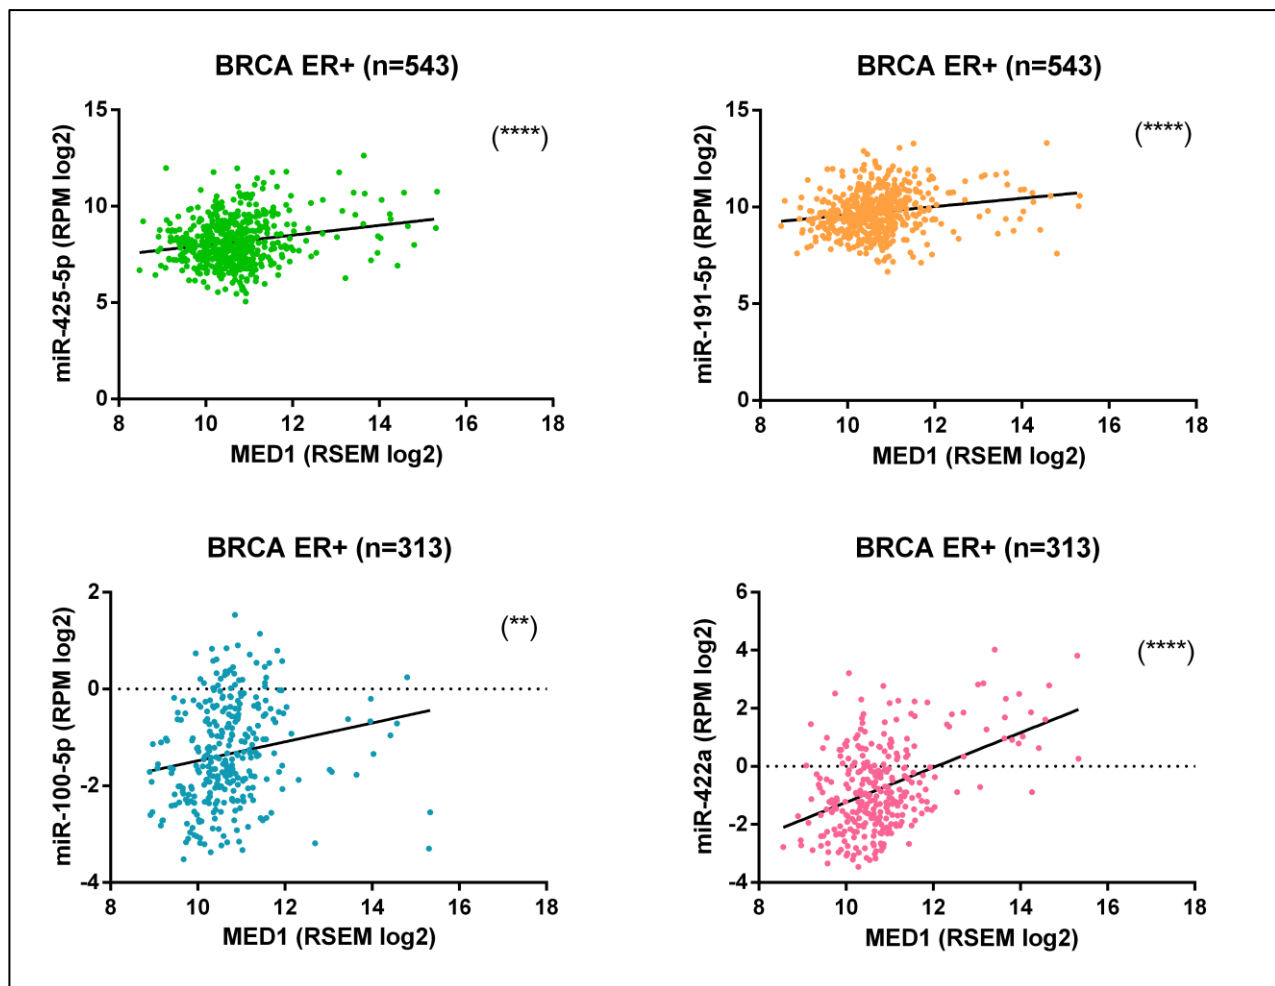

**A**

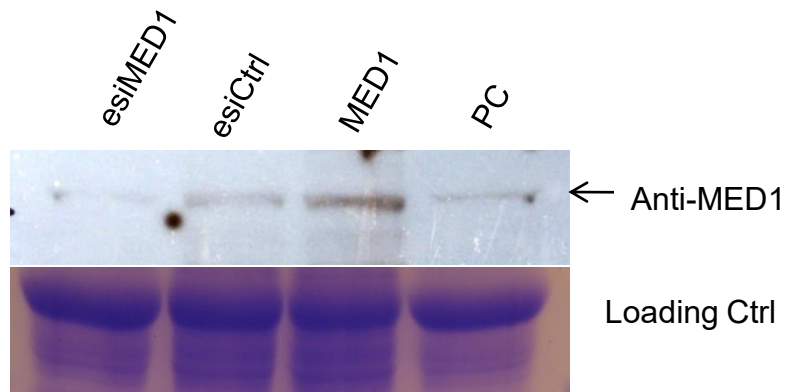

**B**

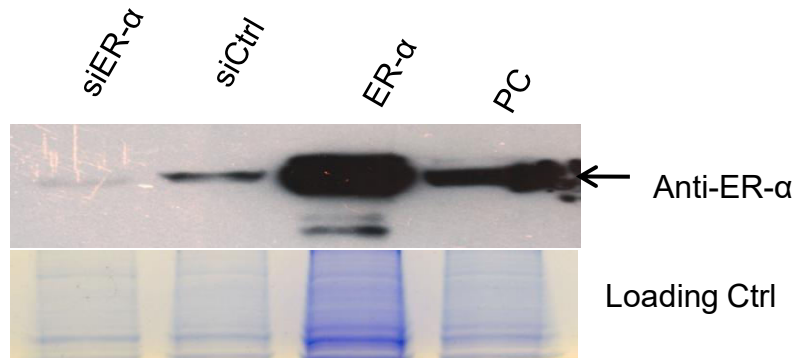

**A**

### *hsa-miR-191* and *hsa-miR-425* genomic alterations in breast cancer (TCGA dataset)

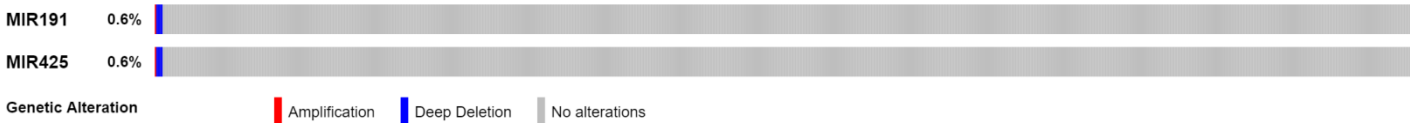**B**

#### miR-191-5p

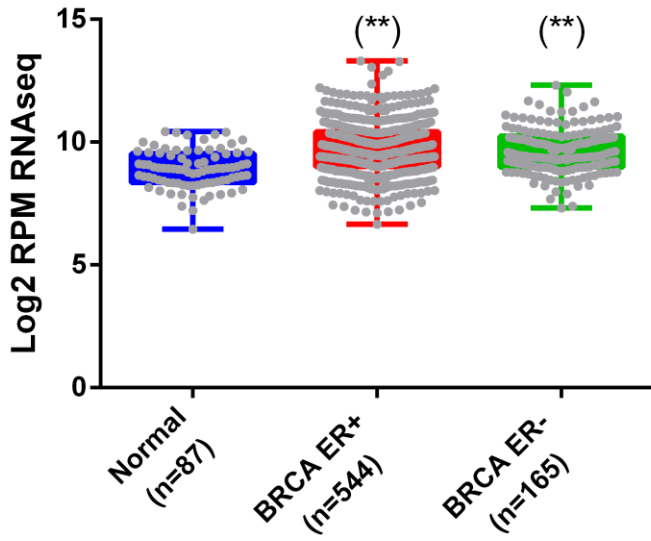**C**

#### miR-425-5p

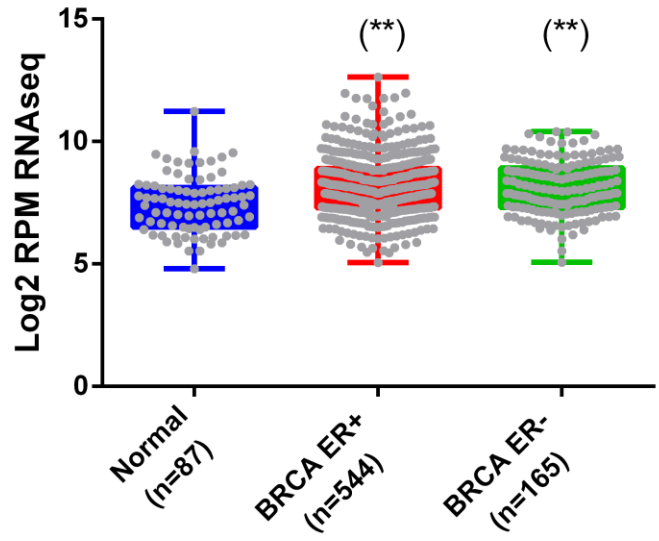

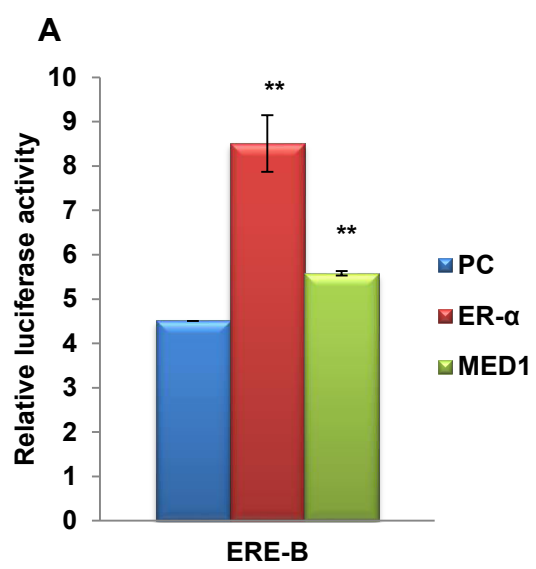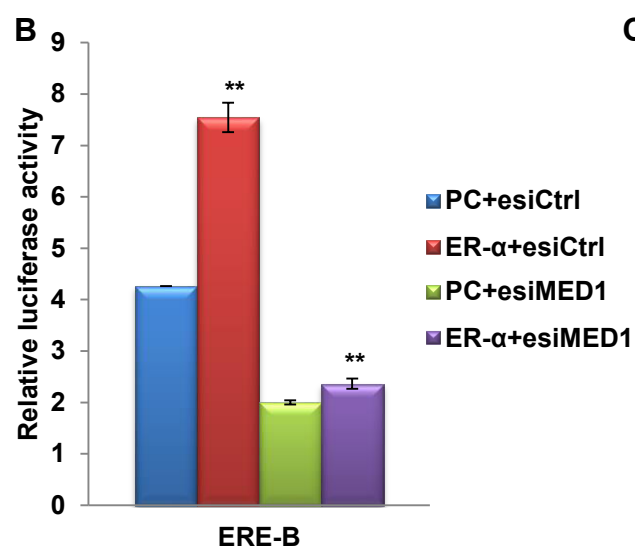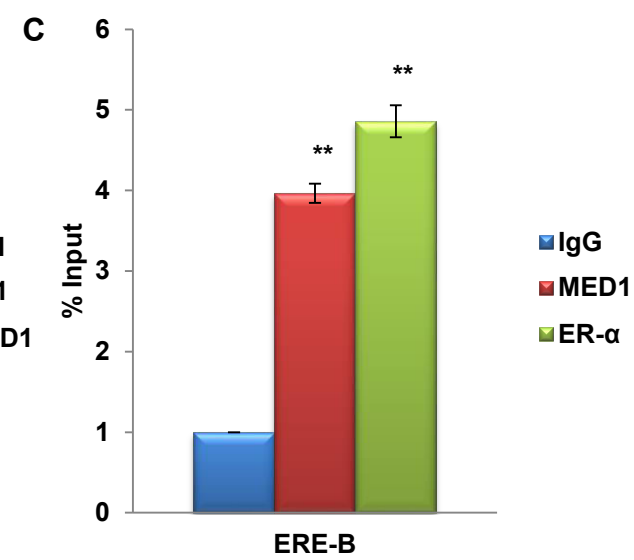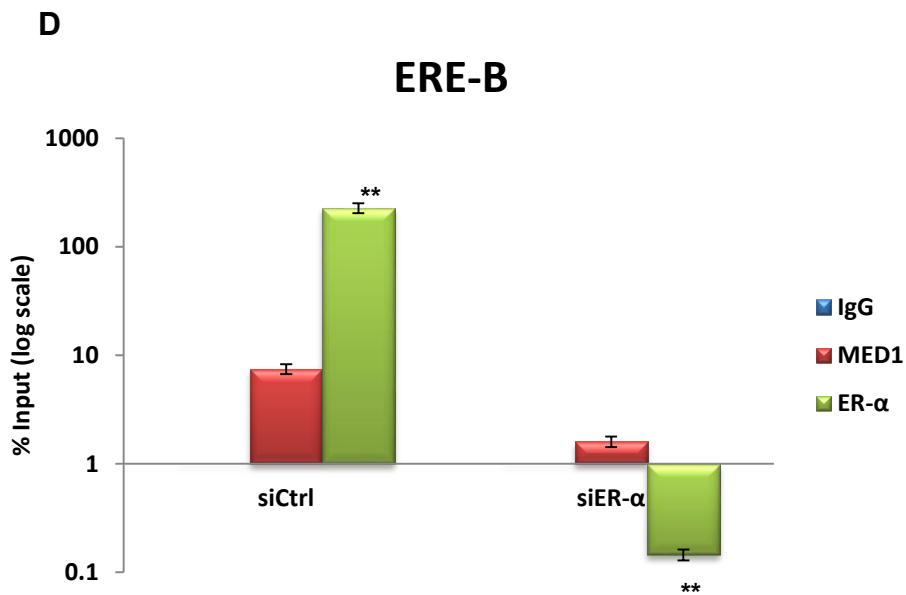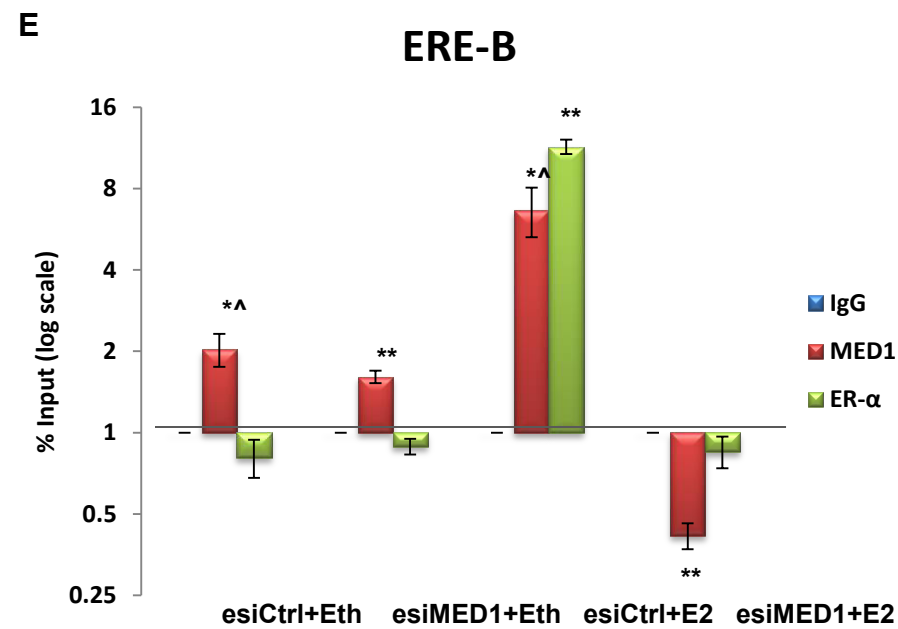

### **Supplementary Data 1 – MED1 expression in breast cancer and correlation between miRNA and MED1 expression.**

**A.** MED1 expression is significantly upregulated in breast cancer, both considering all breast cancer TCGA samples (N=1043) or **B.** analyzing ER+ and ER- patients separately. **C.** Correlation analysis of MED1 levels with miR-191-5p, miR-425-5p, miR-100-5p and miR-422a showing significant positive correlation (Pearson analysis) in ER+ breast cancer patients using TCGA data. P-value was <0.001(\*\*) or <0.00001(\*\*\*\*).

### **Supplementary Data 2–Confirmation of MED1 protein levels after transient overexpression/inhibition.**

**A.** Confirmation of overexpression/ inhibition of MED1 protein levels in MCF7 cells. Level of MED1 was transiently up/ downregulated by transfecting with pCDNA3.1-MED1 (MED1) or pCDNA3.1 (PC) and esiMED1/esiCtrl. The corresponding effect on MED1 protein levels in response to MED1 overexpression/downregulation was then checked by western blotting using antibody specific to that of MED1 (Santacruz Biotechnology). **B.** Confirmation of overexpression/ inhibition of ER- $\alpha$  protein levels in MCF7 cells. Level of ER- $\alpha$  was transiently up/ downregulated by transfecting with pCDNA3.1- ER- $\alpha$  (ER- $\alpha$ ) or pCDNA3.1 (PC) and si ER- $\alpha$  /siCtrl.

### **Supplementary Data 3 – Alterations of miR-191-5p and miR-425-5p in breast cancer.**

**A.** miR191/425 is not mutated and rarely amplified in BC (source: TCGA dataset), suggesting a transcriptional regulation of these two miRNAs. The analysis of 796 samples from TCGA miRNA seq experiments demonstrates that both miR-191-5p (**B**) and miR-425-5p (**C**) are significantly upregulated in both ER+ and ER- breast cancer patients compared to normals (p<0.0001 at Mann-Whitney test).

### **Supplementary Data 4– MED1 and ER- $\alpha$ bind to promoter ERE-B upstream of miR-191/425 cluster.**

**A.** Luciferase activity of ERE-B luciferase construct upstream of miR-191/425 cluster in response to ER or MED1 overexpression. **B-E.** Binding of MED1 and ER- $\alpha$  to ERE-B to regulate miR-191/425 cluster. Levels of MED1 were modulated (using esiMED1/esiCtrl) along with overexpression of ER- $\alpha$  and effect on luciferase activity of ERE-B was observed. Increase in luciferase activity observed in response to ER- $\alpha$  (**B**) was not there when combined with the inhibition of MED1. **C.** CHIP assay results showing % input of bound chromatin on ERE-B, element present upstream of miR-191/425 in MCF7 cells using antibody specific to MED1/ ER- $\alpha$ . **D.** CHIP assay result showing recruitment of both ER- $\alpha$  and MED1 on ERE-B in response to ER- $\alpha$  inhibition using specific siRNA. **E.** CHIP assay was performed using ER- $\alpha$  or MED1 specific antibodies in response to estrogen/ethanol treatment (E2/Eth (ethanol; vehicle control)  $1 \times 10^{-8}$  M for 2 hrs) with/without inhibition of MED1. The graph shows real time PCR based quantification of bound chromatin (% input) on ERE-B in MCF7 cells. (\*\*P<0.05, \*^ P<0.1). Error bars denote  $\pm$  SD.
